# Supplementary material for: A sensitive SERS-based sandwich immunoassay platform for simultaneous multiple detection of foodborne pathogens without interference
Source: Royal Society of Chemistry journal article supplement (doi:10.1039/d0ay01541e), 2020-01-01
Supplement: d0ay01541e1.pdf [file d0ay01541e1.pdf]

## Supporting information

### **A sensitive SERS-based sandwich immunoassay platform for simultaneous multiple detection of foodborne pathogens without interference**

Xiangru Bai,<sup>\*a</sup> Aiguo Shen,<sup>\*b</sup> Jiming Hu<sup>b</sup>

<sup>a</sup> Institute of Environment and Safety, Wuhan Academy of Agricultural Science, Wuhan 430207, P.R. China

<sup>b</sup> College of Chemistry and Molecular Sciences, Wuhan University, Wuhan 430072, P.R. China

<sup>\*</sup>To whom correspondence should be addressed.

Dr. X. R. Bai, E-mail: baimaster@126.com.

Prof. A. G. Shen, E-mail: agshen@whu.edu.cn.

#### List of contents

1. **Figure S1.** TEM image of Au nanoparticles.
2. **Figure S2.** The chemical structure of the two Raman reporters.
3. **Figure S3.** (A) The overlapping signal from four typical conventional Raman reporters in the fingerprint region (CV, CVa, malachite green, 4-MBA); (B) Raman spectra of two SERS probes marked with OPE0 and MBN.
4. **Figure S4.** Zeta and dynamic light scattering (DLS) data for (a, b) Au NPs; (c, d) Au NPs@pLL; (e, f) Au NPs@pLL@Ab.
5. **Figure S5.** TEM and SERS spectra of *E.coli* and *S.aureus*.

6. **Figure S6.** The absorption spectra of Au NPs with (red line) and without (black line) salt addition.

7. **Figure S7.** Optimization experiment of capture probes and SERS probes for *E.coli*.

8. **Figure S8.** Optimization experiment of capture probes and SERS probes for *S.aureus*.

9. **Table S1.** Comparison of LOD with the other existing SERS based methods.

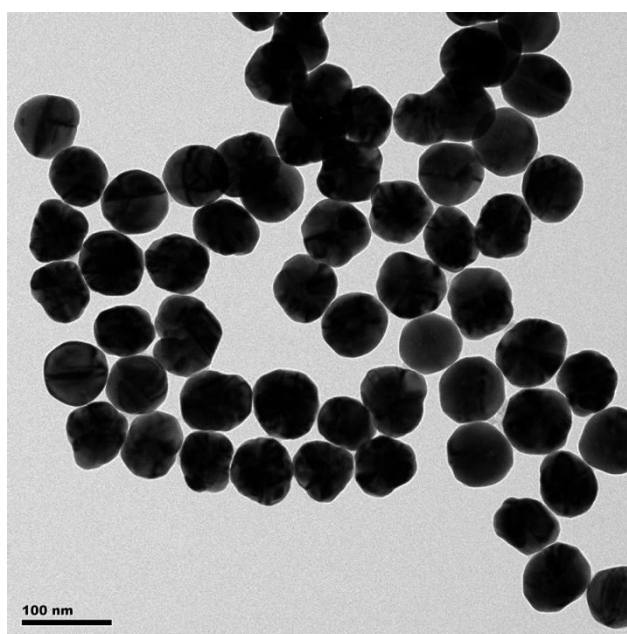

**Figure S1.** TEM image of Au nanoparticles.

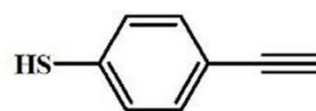

OPE0

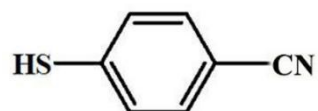

MBN

**Figure S2.** The chemical structure of the two Raman reporters.

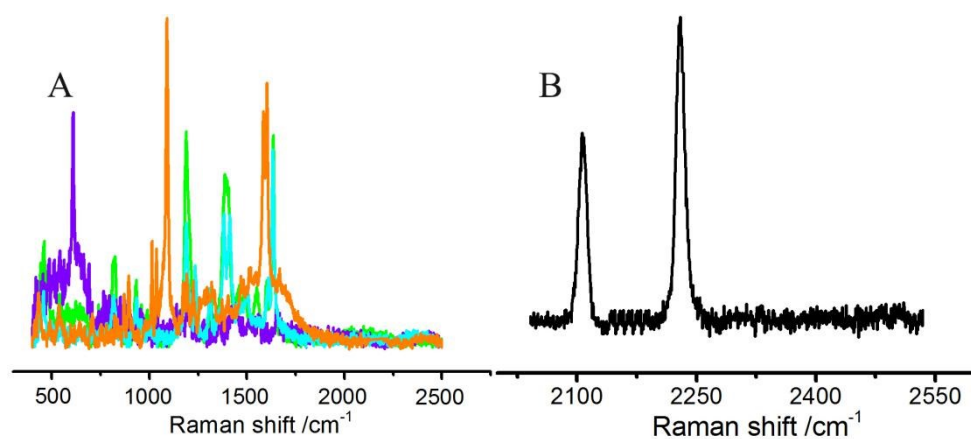

**Figure S3.** (A) The overlapping signal from four typical conventional Raman reporters in the fingerprint region (CV, CVa, malachite green, 4-MBA); (B) Raman spectra of two SERS probes marked with OPE0 and MBN.

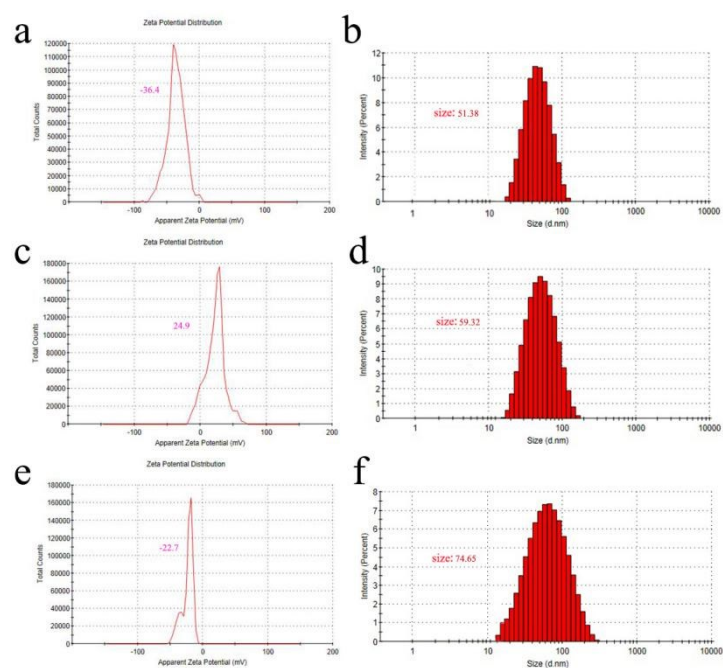

**Figure S4.** Zeta and dynamic light scattering (DLS) data for (a, b) Au NPs; (c, d) Au NPs@pLL; (e, f) Au NPs@pLL@Ab.

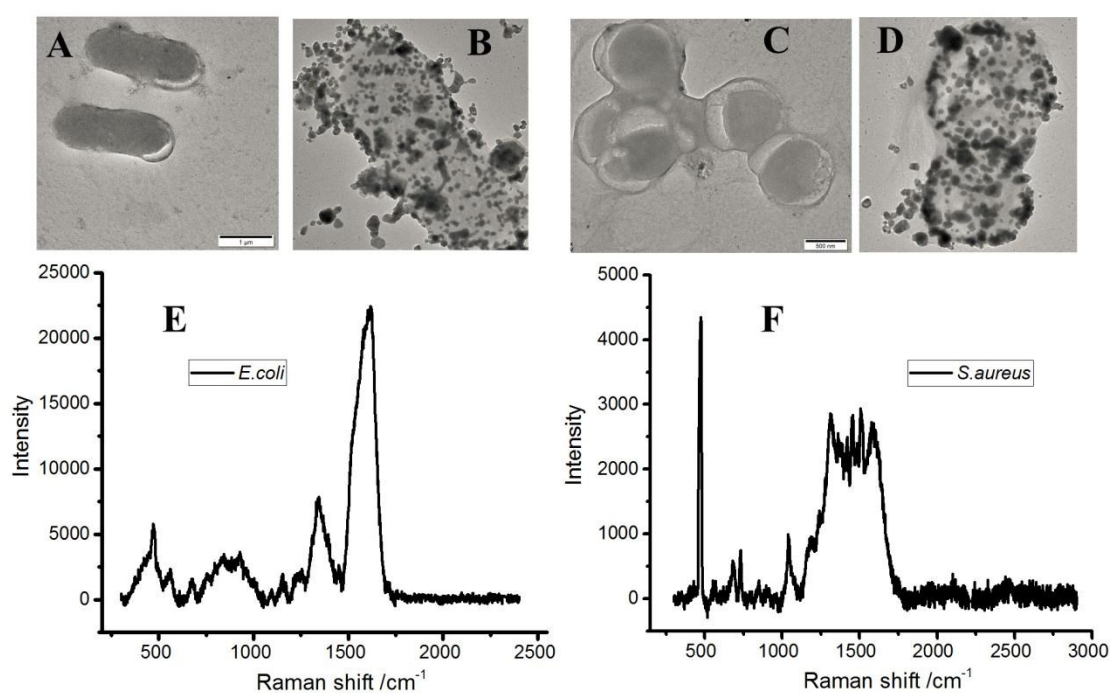

**Figure S5.** TEM and SERS spectra of *E.coli* and *S.aureus*. (A, C) was the TEM image of *E.coli* and *S.aureus*; (B, D) was the TEM image of *E.coli* and *S.aureus* after the loading of Au NPs; (E, F) was the SERS spectra of *E.coli* and *S.aureus*, respectively.



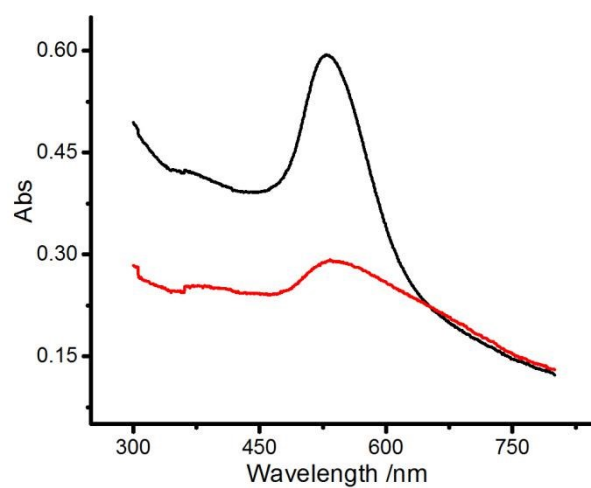

**Figure S6.** The absorption spectra of Au NPs with (red line) and without (black line) salt addition.



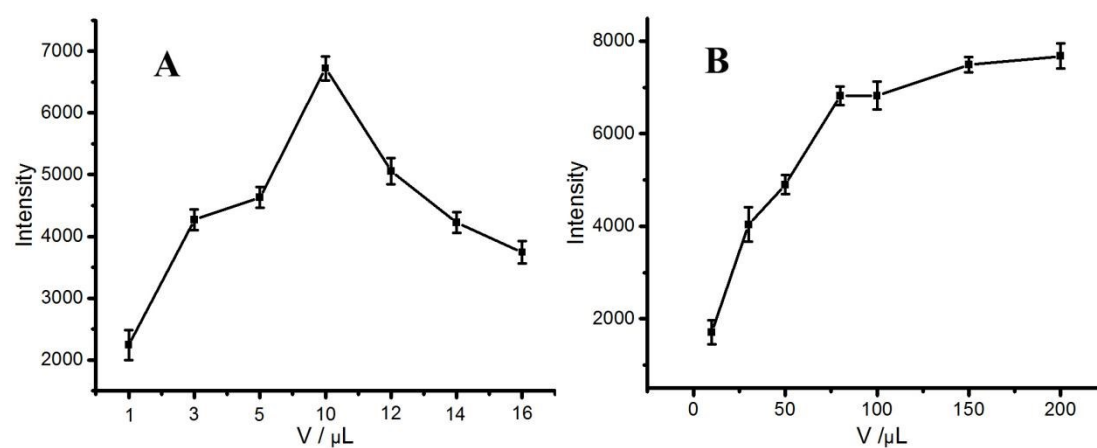

**Figure S7.** Optimization experiment of capture probes and SERS probes for *E. coli*.

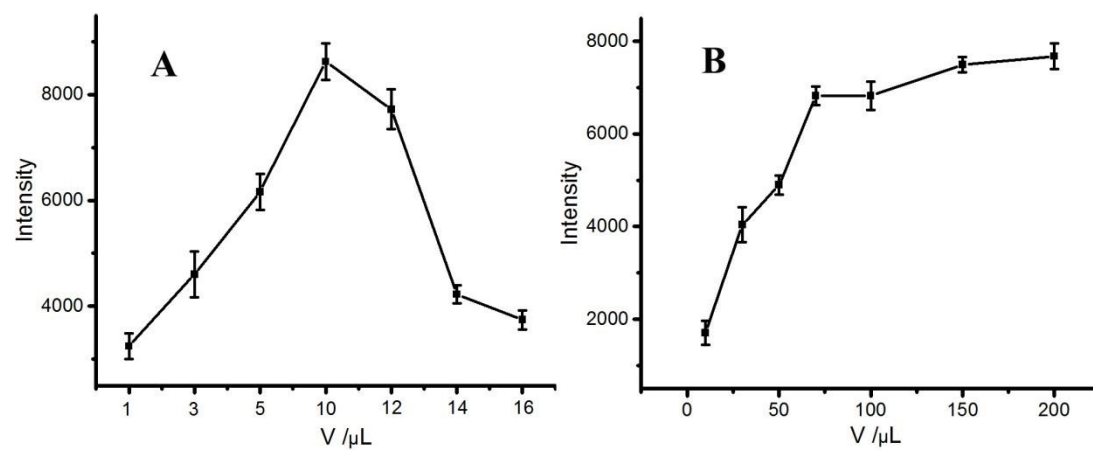

**Figure S8.** Optimization experiment of capture probes and SERS probes for *S. aureus*.



**Table S1.** Comparison of LOD with the other existing SERS based methods.

| Bacteria              | LOD (cfu/mL) | Refs.                                  |
|-----------------------|--------------|----------------------------------------|
| <i>S. aureus</i>      | 1000         | Wang et al., 2011 <sup>1</sup>         |
| <i>S. typhimurium</i> | 1000         |                                        |
| <i>S. aureus</i>      | 35           | Zhang et al., 2015 <sup>2</sup>        |
| <i>S. typhimurium</i> | 15           |                                        |
| <i>E.coli</i>         | 50           | Zhang et al., 2018 <sup>3</sup>        |
| <i>S. aureus</i>      | 20           |                                        |
| <i>E. Coli</i>        | 100          | Hongdeok et al., 2016 <sup>4</sup>     |
| <i>F. tularensis</i>  | 100          |                                        |
| <i>S. aureus</i>      | 100-1000     | Ravindranath et al., 2011 <sup>5</sup> |
| <i>E.coli</i>         |              |                                        |
| <i>Salm</i>           |              |                                        |
| <i>E.coli</i>         | 10           | Our method                             |
| <i>S. aureus</i>      | 25           |                                        |

1. Y. Wang, S. Ravindranath and J. Irudayaraj, *Anal. Bioanal. Chem.*, 2010, **399**, 1271-1278.

2. H. Zhang, X. Ma, Y. Liu, N. Duan, S. Wu, Z. Wang and B. Xu, *Biosens. Bioelectron.*, 2015, **74**, 872-877.

3. C. Y. Zhang, C. W. Wang, R. Xiao, L. Tang, J. Huang, D. Wu, S. W. Liu, Y. Wang, D. Zhang, S. Q. Wang and X. M. Chen, *J. Mater. Chem. B.*, 2018, **6**, 3751-3761.

4. J. Hongdeok, H. E. Young, K. Yongshin, C. Jaebum, J. Jihoon and L. D. Woo, *J. biomed. Lnanotechnol.*, 2016, **12**, 1938-1951.

5. S. P. Ravindranath, Y. L. Wang and J. Irudayaraj, *Sensor Actuat B-Chem.*, 2011,

**152, 183-190.**
